# Supplementary material
Source: PubMed Central journal article supplement (PMC9597608)
Supplement: mmc1.pdf [file mmc1.pdf]

# THE LANCET

## Diabetes & Endocrinology

### Supplementary appendix

This appendix formed part of the original submission and has been peer reviewed. We post it as supplied by the authors.

Supplement to: Birkebaek NH, Kamrath C, Grimsman JM, et al. Impact of the COVID-19 pandemic on long-term trends in the prevalence of diabetic ketoacidosis at diagnosis of paediatric type 1 diabetes: an international multicentre study based on data from 13 national diabetes registries. *Lancet Diabetes Endocrinol* 2022; published online Oct 3. [https://doi.org/10.1016/S2213-8587\(22\)00246-7](https://doi.org/10.1016/S2213-8587(22)00246-7).

## Supplemental Material

### Impact of the COVID-19 pandemic on long-term trends in the prevalence of diabetic ketoacidosis at diagnosis of paediatric type 1 diabetes: an international multicentre study based on data from 13 national diabetes registries

1. **Methods:** (a) Joinpoint regression analysis (page 2)  
(b) Thirteen participating diabetes registers (page 3)
2. **Figure S1.** Joinpoint regression for the prevalence of diabetic ketoacidosis between 2006–2019 and 2006–2021 (page 4)
3. **Figure S2.** Prevalence of diabetic ketoacidosis at diagnosis of type 1 diabetes in children in the years 2020 and 2021 compared to the non-linear trend between 2006 to 2019 (page 5)
4. **Figure S3.** Excess in the prevalence of diabetic ketoacidosis vs excess all-cause mortality and the Stringency Index (page 6)
5. **Table S1.** Documented cases of new-onset paediatric type 1 diabetes in the 13 registries from 2006 to 2021 according to the existence of diabetic ketoacidosis (page 7)

### **Methods: (a) Joinpoint regression analysis**

To analyse differences in the increasing trend of DKA prevalence over time, joinpoint regression (segmented regression) was applied to the logarithmically transformed directly age- and sex-standardized prevalence taking account of their standard errors. This allowed to make inferences about changes in trends over time. The underlying assumption is that the observation period can be divided into subperiods with specific loglinear trend. Joinpoints represent the time points when the trends change. In each case, the best model among models allowing 0 and 5 joinpoints was selected according to a permutation test approach. Segmental trends were described by the annual percent change (APC) with corresponding 95% CIs.

Analyses were performed using the Joinpoint Regression Program (Version 4.9.0.1, February 2022, Statistical Research and Applications Branch, National Cancer Institute, Bethesda, Maryland, USA).

### **References:**

1. Kim HJ, Fay MP, Feuer EJ, et al. Permutation tests for joinpoint regression with applications to cancer rates. *Stat Med* 2000;19(3):335–51.
2. Baechle C, Stahl-Pehe A, Prinz N, et al. Prevalence trends of type 1 and type 2 diabetes in children and adolescents in North Rhine-Westphalia, the most populous federal state in Germany, 2002-2020 [published online ahead of print, 2022 Jul 16]. *Diabetes Res Clin Pract.* 2022;109995. doi:10.1016/j.diabres.2022.109995

## Methods: (b) Participating registers

| Register                                                                                         | Reference                                                                                                                                                                                                                                                                                     |
|--------------------------------------------------------------------------------------------------|-----------------------------------------------------------------------------------------------------------------------------------------------------------------------------------------------------------------------------------------------------------------------------------------------|
| Australasian Diabetes Data Network (ADDN), Australia                                             | <a href="https://www.addn.org.au">https://www.addn.org.au</a>                                                                                                                                                                                                                                 |
| Two regions of New Zealand (Auckland and Christchurch)                                           | Clapin H, Phelan H, Bruns L, Jr., et al. Australasian Diabetes Data Network: Building a Collaborative Resource. <i>J Diabetes Sci Technol</i> 2016; <b>10</b> (5):1015-26.                                                                                                                    |
| The state of Colorado, USA                                                                       | Alonso GT, Coakley A, Pyle L, Manseau K, Thomas S, Rewers A. Diabetic Ketoacidosis at Diagnosis of Type 1 Diabetes in Colorado Children, 2010-2017. <i>Diabetes Care</i> 2020; <b>43</b> (1):117-121.                                                                                         |
| Austria, Germany and Luxembourg; Diabetes Patient Follow-Up registry (DPV)                       | Hofer SE, Schwandt A, Holl RW. Standardized Documentation in Pediatric Diabetology: Experience from Austria and Germany. <i>J Diabetes Sci Technol</i> 2016; <b>10</b> (5):1042-9.                                                                                                            |
| Czech Republic; Czech National Childhood Diabetes Register (ČENDA)                               | Šumník Z, Venháčová J, Škvor J, et al. Five years of improving diabetes control in Czech children after the establishment of the population-based childhood diabetes register ČENDA. <i>Pediatr Diabetes</i> 2020; <b>21</b> (1):77-87.                                                       |
| Denmark; Danish Registry of Childhood and Adolescent Diabetes (DanDiabKids)                      | Svensson J, Cerqueira C, Kjærsgaard P, et al. Danish Registry of Childhood and Adolescent Diabetes. <i>Clin Epidemiol</i> 2016; <b>8</b> :679-683.                                                                                                                                            |
| Italy; Study Group for diabetes of the Italian Society for Paediatric Endocrinology and Diabetes | Cherubini V, Skrami E, Ferrito L, et al. High frequency of diabetic ketoacidosis at diagnosis of type 1 diabetes in Italian children: a nationwide longitudinal study, 2004-2013. <i>Sci Rep</i> 2016; <b>6</b> :38844.                                                                       |
| Norway; Norwegian Childhood Diabetes Registry (NCDR)                                             | Skrivarhaug T, Stene LC, Drivvoll AK, Strom H, Joner G. Incidence of type 1 diabetes in Norway among children aged 0-14 years between 1989 and 2012: has the incidence stopped rising? Results from the Norwegian Childhood Diabetes Registry. <i>Diabetologia</i> 2014; <b>57</b> (1):57-62. |
| Slovenia; Slovenian national childhood type 1 diabetes registry                                  | Dovc K, Telic SS, Lusa L, et al. Improved metabolic control in pediatric patients with type 1 diabetes: a nationwide prospective 12-year time trends analysis. <i>Diabetes Technol Ther</i> 2014; <b>16</b> (1):33-40.                                                                        |
| Sweden; The Swedish Paediatric Diabetes Quality Registry (SWEDIABKIDS)                           | Hanberger L, Samuelsson U, Lindblad B, Ludvigsson J. A1C in children and adolescents with diabetes in relation to certain clinical parameters: the Swedish Childhood Diabetes Registry SWEDIABKIDS. <i>Diabetes Care</i> 2008; <b>31</b> (5):927-929.                                         |
| Wales; Children and Young People's Wales Diabetes Network (and Brecon Group)                     | <a href="https://www.welshpaediatrics.org.uk/link/children-and-young-people%E2%80%99s-wales-diabetes-network-and-brecon-group">https://www.welshpaediatrics.org.uk/link/children-and-young-people%E2%80%99s-wales-diabetes-network-and-brecon-group</a>                                       |

**Figure S1.** Joinpoint regression analysis for the prevalence of diabetic ketoacidosis between 2006–2019 and 2006–2021.

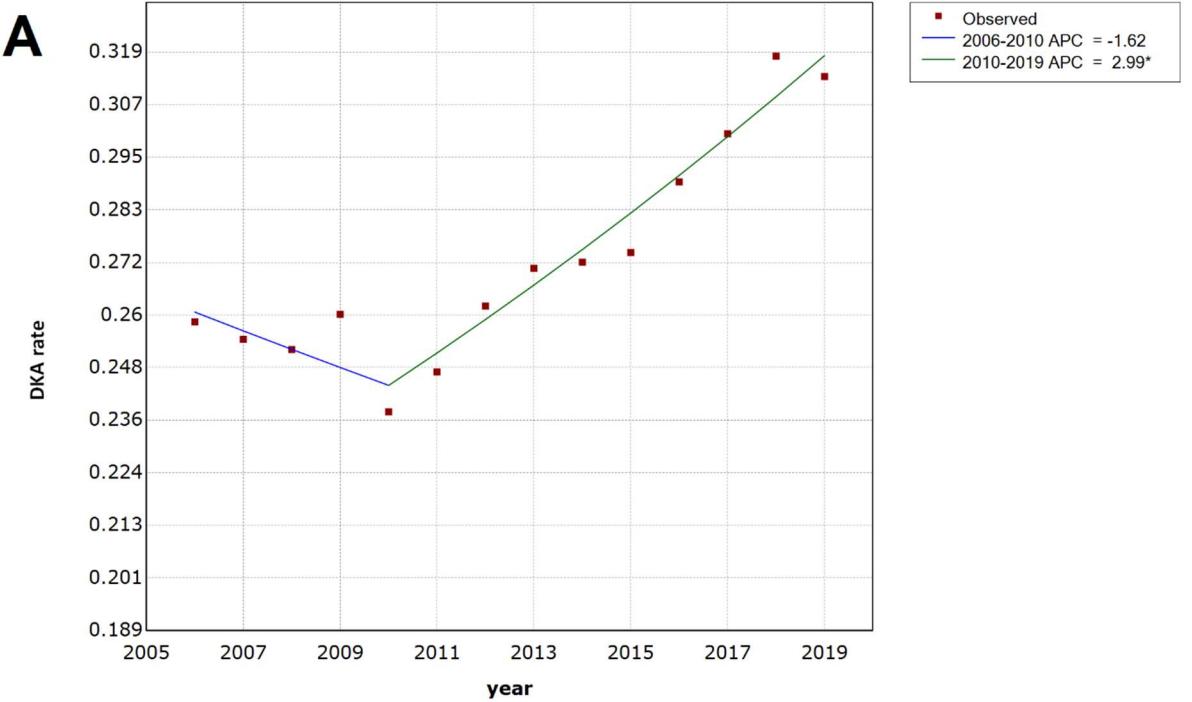

\* Indicates that the Annual Percent Change (APC) is significantly different from zero at the alpha = 0.05 level  
Final Selected Model: 1 Joinpoint.

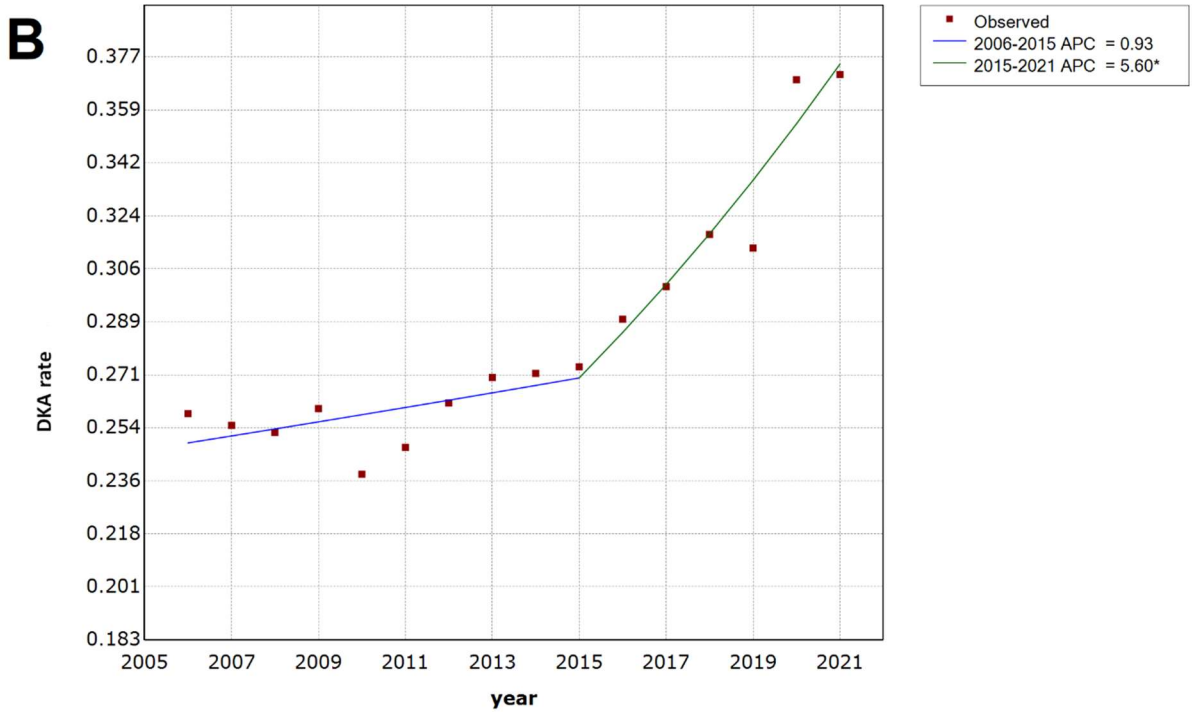

\* Indicates that the Annual Percent Change (APC) is significantly different from zero at the alpha = 0.05 level  
Final Selected Model: 1 Joinpoint.

Mean prevalence of diabetic ketoacidosis (DKA) at diagnosis of paediatric type-1-diabetes in 13 registries and segmental trend curves estimated by joinpoint regression for the period 2006 to 2019 (A) and from 2006 to 2021 (B). APC: annual percent change.

**Figure S2.** Prevalence of diabetic ketoacidosis at diagnosis of type 1 diabetes in children in the years 2020 and 2021 compared to predicted prevalence estimated from non-linear (linear + quadratic) temporal trend from 2006 to 2019.

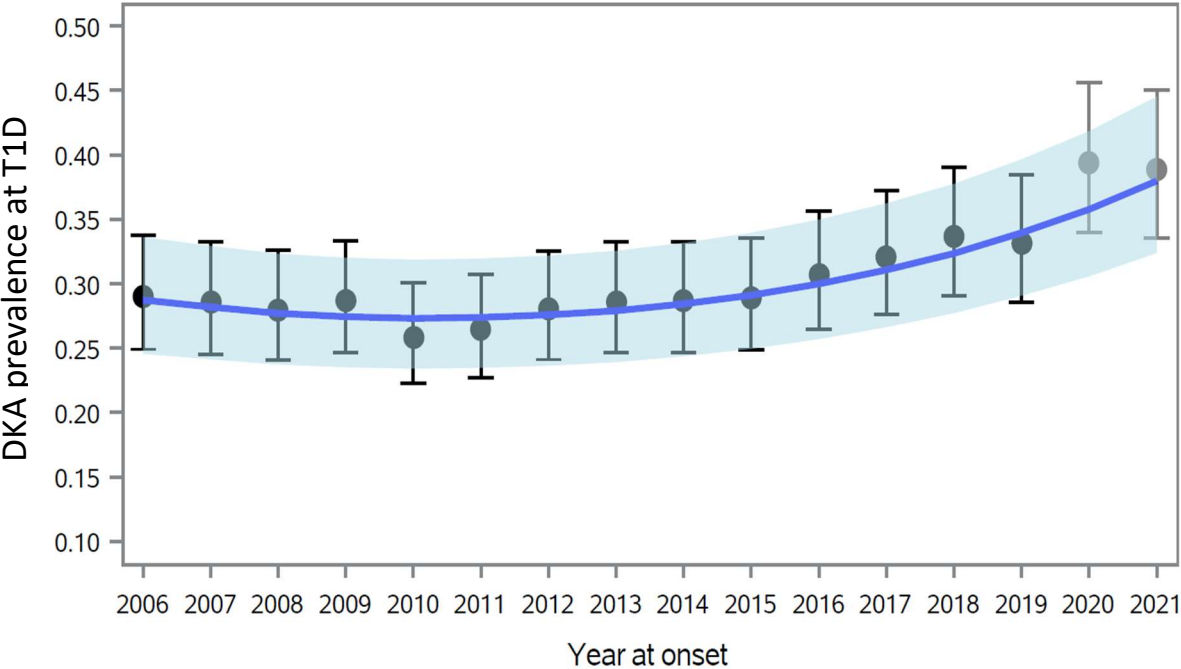

To analyse predictors for diabetic ketoacidosis (DKA) at diagnosis of paediatric type 1 diabetes in 2020 and 2021, we used a log-binomial model based on data from 2006-2019 with age groups, sex, country, and year as predictors, including countries as random intercepts. In this model we included year and year<sup>2</sup> as predictors of DKA prevalence. The estimated trend line is shown in dark blue with the corresponding 95% confidence interval (light blue area). The black dots show the observed age- and sex-adjusted DKA prevalence at T1D onset from 2006 to 2019, which was used to calculate the trend until 2021. The grey dots show the observed age- and sex-adjusted DKA prevalence for 2020 and 2021. The vertical bars indicate the corresponding 95% confidence interval of the observed DKA prevalence.

According to the model, the adjusted observed prevalence of DKA was 39.4% (95% CI, 34.0–45.6%) in 2020 and 38.9% (95% CI, 33.6–45.0%) in 2021, and the adjusted predicted prevalence were 35.8% (95% CI, 30.6–41.8%) and 38.0% (95% CI, 32.4–44.5%), respectively. The adjusted absolute percentage differences were 3.6% (95% CI, 2.1–5.1; P<0.0001) and 0.9 (95% CI, -0.5–2.3%; P=0.21) for 2020 and 2021, respectively.

**Figure S3.** Excess in the prevalence of diabetic ketoacidosis vs excess all-cause mortality and the Stringency Index.

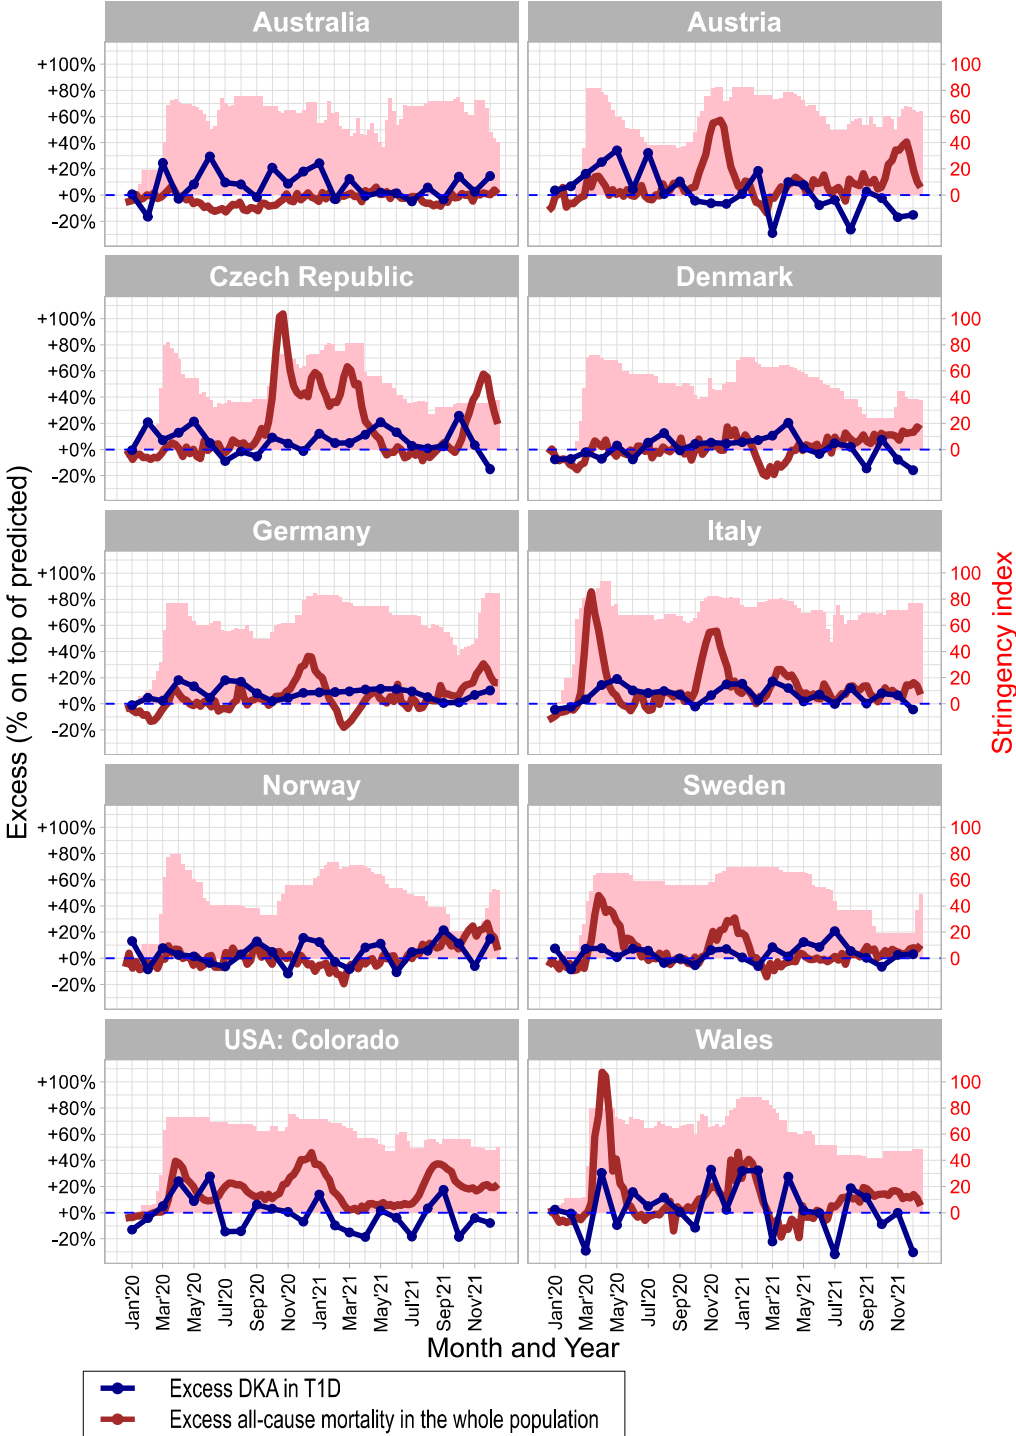

The percent excess in the diabetic ketoacidosis (DKA) prevalence (observed in 2020 and 2021 vs the predicted prevalence) is plotted along the excess all-cause mortality (labelling left), and the Stringency Index (labelling right) is plotted as a pink shaded area being indicators describing the perception of the pandemic severity by the government. Only the 10 registers with more than 100 new cases each year in 2020 and 2021 are plotted to minimise random noise. The figure illustrates that the governmental responses to the spring and autumn waves were nearly similar (the Stringency Index levels were comparable in most countries), whereas the objective measure of the pandemic severity expressed as excess all-cause mortality differed among countries both in size and timing.

**Table S1:** Documented cases of new-onset paediatric type 1 diabetes in the 13 registries from 2006 to 2021 according to the status of diabetic ketoacidosis.

| Year of diabetes onset |         | Australia  | Austria   | Czech Republic | Denmark   | Germany    | Italy      | Luxemburg | New Zealand | Norway    | Slovenia  | Sweden     | USA        | Wales     | Total       |
|------------------------|---------|------------|-----------|----------------|-----------|------------|------------|-----------|-------------|-----------|-----------|------------|------------|-----------|-------------|
| 2006                   | all     | 245        | 101       | 167            | 284       | 1730       | 807        | 13        | 23          | 234       | 54        | 738        | -          | 189       | 4585        |
|                        | DKA (%) | 88 (35.9)  | 34 (33.7) | 34 (20.4)      | 48 (16.9) | 328 (19.0) | 350 (43.4) | 4 (30.8)  | 9 (39.1)    | 60 (25.6) | 16 (29.6) | 163 (22.1) | -          | 43 (22.8) | 1177 (25.7) |
|                        | no DKA  | 157        | 67        | 133            | 236       | 1402       | 457        | 9         | 14          | 174       | 38        | 575        | -          | 146       | 3408        |
| 2007                   | all     | 344        | 112       | 209            | 276       | 1947       | 801        | 23        | 20          | 227       | 55        | 715        | -          | 162       | 4891        |
|                        | DKA (%) | 101 (29.4) | 35 (31.3) | 53 (25.4)      | 51 (18.5) | 371 (19.1) | 357 (44.6) | 10 (43.5) | 7 (35.0)    | 49 (21.6) | 22 (40.0) | 140 (19.6) | -          | 42 (25.9) | 1238 (25.3) |
|                        | no DKA  | 243        | 77        | 156            | 225       | 1576       | 444        | 13        | 13          | 178       | 33        | 575        | -          | 120       | 3653        |
| 2008                   | all     | 370        | 116       | 215            | 276       | 1999       | 884        | 11        | 18          | 256       | 40        | 651        | -          | 161       | 4997        |
|                        | DKA (%) | 113 (30.5) | 33 (28.4) | 45 (20.9)      | 55 (19.9) | 385 (19.3) | 374 (42.3) | 5 (45.5)  | 3 (16.7)    | 72 (28.1) | 11 (27.5) | 116 (17.8) | -          | 40 (24.8) | 1252 (25.1) |
|                        | no DKA  | 257        | 83        | 170            | 221       | 1614       | 510        | 6         | 15          | 184       | 29        | 535        | -          | 121       | 3745        |
| 2009                   | all     | 342        | 130       | 227            | 296       | 2071       | 1049       | 16        | 27          | 328       | 46        | 720        | -          | 158       | 5410        |
|                        | DKA (%) | 102 (29.8) | 56 (43.1) | 49 (21.6)      | 56 (18.9) | 426 (20.6) | 429 (40.9) | 6 (37.5)  | 9 (33.3)    | 85 (25.9) | 11 (23.9) | 133 (18.5) | -          | 35 (22.2) | 1397 (25.8) |
|                        | no DKA  | 240        | 74        | 178            | 240       | 1645       | 620        | 10        | 18          | 243       | 35        | 587        | -          | 123       | 4013        |
| 2010                   | all     | 412        | 143       | 256            | 320       | 2143       | 950        | 18        | 77          | 302       | 58        | 679        | 222        | 186       | 5766        |
|                        | DKA (%) | 128 (31.1) | 40 (28.0) | 60 (23.4)      | 76 (23.8) | 248 (11.6) | 418 (44.0) | 3 (16.7)  | 19 (24.7)   | 71 (23.5) | 15 (25.9) | 133 (19.6) | 93 (41.9)  | 59 (31.7) | 1363 (23.6) |
|                        | no DKA  | 284        | 103       | 196            | 244       | 1895       | 532        | 15        | 58          | 231       | 43        | 546        | 129        | 127       | 4403        |
| 2011                   | all     | 484        | 181       | 338            | 296       | 2243       | 1054       | 27        | 75          | 302       | 50        | 696        | 299        | 164       | 6209        |
|                        | DKA (%) | 163 (33.7) | 58 (32.0) | 72 (21.3)      | 62 (20.9) | 325 (14.5) | 457 (43.4) | 3 (11.1)  | 18 (24.0)   | 61 (20.2) | 19 (38.0) | 129 (18.5) | 128 (42.8) | 29 (17.7) | 1524 (24.5) |
|                        | no DKA  | 321        | 123       | 266            | 234       | 1918       | 597        | 24        | 57          | 241       | 31        | 567        | 171        | 135       | 4685        |
| 2012                   | all     | 542        | 221       | 341            | 276       | 2497       | 1014       | 21        | 72          | 303       | 50        | 683        | 289        | 185       | 6494        |
|                        | DKA (%) | 181 (33.4) | 77 (34.8) | 68 (19.9)      | 50 (18.1) | 447 (17.9) | 408 (40.2) | 9 (42.9)  | 20 (27.8)   | 80 (26.4) | 28 (56.0) | 132 (19.3) | 137 (47.4) | 52 (28.1) | 1689 (26.0) |
|                        | no DKA  | 361        | 144       | 273            | 226       | 2050       | 606        | 12        | 52          | 223       | 22        | 551        | 152        | 133       | 4805        |
| 2013                   | all     | 663        | 179       | 315            | 331       | 2438       | 1028       | 31        | 81          | 331       | 64        | 697        | 316        | 170       | 6644        |
|                        | DKA (%) | 215 (32.4) | 75 (41.9) | 67 (21.3)      | 60 (18.1) | 465 (19.1) | 444 (43.2) | 7 (22.6)  | 26 (32.1)   | 89 (26.9) | 27 (42.2) | 124 (17.8) | 141 (44.6) | 41 (24.1) | 1781 (26.8) |
|                        | no DKA  | 448        | 104       | 248            | 271       | 1973       | 584        | 24        | 55          | 242       | 37        | 573        | 175        | 129       | 4863        |
| 2014                   | all     | 733        | 211       | 302            | 328       | 2469       | 915        | 34        | 77          | 335       | 54        | 720        | 304        | 143       | 6625        |
|                        | DKA (%) | 264 (36.0) | 73 (34.6) | 74 (24.5)      | 70 (21.3) | 520 (21.1) | 318 (34.8) | 10 (29.4) | 23 (29.9)   | 83 (24.8) | 25 (46.3) | 149 (20.7) | 145 (47.7) | 33 (23.1) | 1787 (27.0) |
|                        | no DKA  | 469        | 138       | 228            | 258       | 1949       | 597        | 24        | 54          | 252       | 29        | 571        | 159        | 110       | 4838        |



|              |         |             |             |             |             |             |             |            |            |             |            |             |             |            |              |
|--------------|---------|-------------|-------------|-------------|-------------|-------------|-------------|------------|------------|-------------|------------|-------------|-------------|------------|--------------|
| <b>2015</b>  | all     | 742         | 190         | 367         | 340         | 2558        | 904         | 25         | 103        | 316         | 50         | 706         | 355         | 175        | 6831         |
|              | DKA (%) | 276 (37.2)  | 80 (42.1)   | 88 (24.0)   | 83 (24.4)   | 533 (20.8)  | 320 (35.4)  | 10 (40.0)  | 30 (29.1)  | 79 (25.0)   | 13 (26.0)  | 139 (19.7)  | 164 (46.2)  | 40 (22.9)  | 1855 (27.2)  |
|              | no DKA  | 466         | 110         | 279         | 257         | 2025        | 584         | 15         | 73         | 237         | 37         | 567         | 191         | 135        | 4976         |
| <b>2016</b>  | all     | 672         | 210         | 368         | 342         | 2760        | 984         | 33         | 93         | 251         | 69         | 743         | 368         | 163        | 7056         |
|              | DKA (%) | 265 (39.4)  | 70 (33.3)   | 89 (24.2)   | 78 (22.8)   | 599 (21.7)  | 393 (39.9)  | 10 (30.3)  | 26 (28.0)  | 56 (22.3)   | 25 (36.2)  | 186 (25.0)  | 185 (50.3)  | 45 (27.6)  | 2027 (28.7)  |
|              | no DKA  | 407         | 140         | 279         | 264         | 2161        | 591         | 23         | 67         | 195         | 44         | 557         | 183         | 118        | 5029         |
| <b>2017</b>  | all     | 711         | 211         | 358         | 400         | 2671        | 970         | 15         | 76         | 355         | 65         | 720         | 316         | 167        | 7035         |
|              | DKA (%) | 298 (41.9)  | 72 (34.1)   | 81 (22.6)   | 83 (20.8)   | 620 (23.2)  | 370 (38.1)  | 1 (6.7)    | 23 (30.3)  | 88 (24.8)   | 29 (44.6)  | 170 (23.6)  | 191 (60.4)  | 67 (40.1)  | 2093 (29.8)  |
|              | no DKA  | 413         | 139         | 277         | 317         | 2051        | 600         | 14         | 53         | 267         | 36         | 550         | 125         | 100        | 4942         |
| <b>2018</b>  | all     | 702         | 218         | 348         | 353         | 2760        | 990         | 28         | 76         | 377         | 73         | 736         | 333         | 167        | 7161         |
|              | DKA (%) | 326 (43.4)  | 71 (32.6)   | 87 (25.0)   | 84 (23.8)   | 687 (24.9)  | 404 (40.8)  | 9 (32.1)   | 28 (36.8)  | 110 (29.2)  | 32 (43.8)  | 184 (25.0)  | 172 (51.7)  | 60 (35.9)  | 2254 (31.5)  |
|              | no DKA  | 376         | 147         | 261         | 269         | 2073        | 586         | 19         | 48         | 267         | 41         | 552         | 161         | 107        | 4907         |
| <b>2019</b>  | all     | 686         | 245         | 386         | 307         | 2935        | 1094        | 31         | 98         | 394         | 68         | 792         | 309         | 179        | 7524         |
|              | DKA (%) | 305 (44.5)  | 96 (39.2)   | 106 (27.5)  | 71 (23.1)   | 781 (26.6)  | 416 (38.0)  | 8 (25.8)   | 36 (36.7)  | 103 (26.1)  | 31 (45.6)  | 173 (21.8)  | 151 (48.9)  | 61 (34.1)  | 2338 (31.1)  |
|              | no DKA  | 381         | 149         | 280         | 236         | 2154        | 678         | 23         | 62         | 291         | 37         | 619         | 158         | 118        | 5186         |
| <b>2020</b>  | all     | 644         | 268         | 461         | 330         | 3379        | 1162        | 26         | 99         | 453         | 77         | 835         | 290         | 185        | 8209         |
|              | DKA (%) | 357 (55.4)  | 126 (47.0)  | 138 (29.9)  | 79 (23.9)   | 1133 (33.5) | 509 (43.8)  | 9 (34.6)   | 38 (38.4)  | 130 (28.7)  | 36 (46.8)  | 220 (26.3)  | 156 (53.8)  | 74 (40.0)  | 3005 (36.6)  |
|              | no DKA  | 287         | 142         | 323         | 251         | 2246        | 653         | 17         | 61         | 323         | 41         | 615         | 134         | 111        | 5204         |
| <b>2021</b>  | all     | 545         | 288         | 490         | 330         | 3672        | 1521        | 35         | 112        | 396         | 79         | 865         | 315         | 205        | 8853         |
|              | DKA (%) | 287 (52.7)  | 96 (33.3)   | 163 (33.3)  | 91 (27.6)   | 1261 (34.3) | 657 (43.2)  | 17 (48.6)  | 52 (46.4)  | 126 (31.8)  | 35 (44.3)  | 239 (27.6)  | 163 (51.7)  | 79 (38.5)  | 3266 (36.9)  |
|              | no DKA  | 258         | 192         | 237         | 239         | 2411        | 864         | 18         | 60         | 270         | 44         | 626         | 152         | 126        | 5587         |
| <b>Total</b> | all     | 8837        | 3024        | 5148        | 5085        | 40272       | 16127       | 387        | 1127       | 5160        | 952        | 11696       | 3716        | 2759       | 104290       |
|              | DKA (%) | 3469 (39.3) | 1092 (36.1) | 1274 (24.7) | 1097 (21.6) | 9129 (22.7) | 6624 (41.1) | 121 (31.3) | 367 (32.6) | 1342 (26.0) | 375 (39.4) | 2530 (21.6) | 1826 (49.1) | 800 (29.0) | 30046 (28.8) |
|              | no DKA  | 5368        | 1932        | 3874        | 3988        | 31143       | 9503        | 266        | 760        | 3818        | 577        | 9166        | 1890        | 1959       | 74244        |

DKA: diabetic ketoacidosis.
